# Supplementary material for: Development of LAMP assay for early detection of Yersinia ruckeri in aquaculture
Source: PeerJ. 2025 Feb 25;13:e19015. doi: 10.7717/peerj.19015 (PMC11869897; doi:10.7717/peerj.19015)
Supplement: Supplemental Information 2 [file peerj-13-19015-s002.xlsx]

## Sheet: Gene blocks
		GlnA synthetase sequences of target and closely related species synthesided for this study		Allignment between target and closely related sequences of glnA
		>AY333067.1 Yersinia ruckeri strain WS 34/93 glutamine synthetase (glnA) gene, partial cds		CLUSTAL O(1.2.4) multiple sequence alignment
				ruckeri ---CTCGATTGGTGGCTGGAAAGGCATTAACGAATCCGACATGGTATTGATGCCAGATGC	57
		CTCGATTGGTGGCTGGAAAGGCATTAACGAATCCGACATGGTATTGATGCCAGATGCCAGCACTGCAGTG		rohedi CTCCTCGATTGGTGGCTGGAAAGGCATTAACGAATCCGACATGGTACTGATGCCAGACGC	60
		ATGGATCCATTCTTCGCAGATTCTACCCTGATTATCCGTTGTGACATTCTGGAACCCGGCACCATGCAGG		frederiksenii -TCCTCGATTGGTGGCTGGAAAGGCATTAATGAATCCGACATGGTACTGATGCCAGACGC	59
		GTTATGACCGTGACCCACGTTCTATCTCCAAACGTGCAGAAGACTTCCTGAAATCTTCAGGTATCGCAGA		*************************** *************** ********** **
		TACCGTGCTGTTCGGACCAGAACCTGAATTCTTCTTGTTTGACGATATTCGCTTTGGCAGCAGCATCCGT		ruckeri CAGCACTGCAGTGATGGATCCATTCTTCGCAGATTCTACCCTGATTATCCGTTGTGACAT	117
		GGCTCCCACGTTGCTATCGATGATATCGAAGGCGCATGGAACTCCAGCACCAAATACGAAGGTGGTAACA		rohedi CAGCACTGCTGTTATGGATCCGTTCTTCGAAGACTCAACACTGATTATCCGTTGTGACAT	120
		AAGGCCATCGTCCCGCAGTAAAAGGCGGTTACTTCCCGGTTCCCCCAGTTGATTCCGCGCAAGATCTGCG		frederiksenii CAGCACCGCTGTTATGGATCCGTTCTTCGAAGATTCCACACTGATTATCCGTTGTGACAT	119
		TTCTGCCATGTGTTTAACCATGGAAGATATGGGTCTGGTTGTTGAAGCACATCACCACGAAGTCGCCACT		****** ** ** ******** ******* *** ** ** ********************
		GCTGGTCAGAACGAAGTGGCTACCCGCTTCAATACCATGACCAAGAAAGCGGATGAAATCCAAATCTACA		ruckeri TCTGGAACCCGGCACCATGCAGGGTTATGACCGTGACCCACGTTCTATCTCCAAACGTGC	177
		AATATGTCGTGCACAACGTAGCGCAT		rohedi CCTCGAGCCAGGCACCATGCAAGGTTATGACCGCGACCCACGTTCTATCTCTAAACGTGC	180
				frederiksenii CCTTGAGCCAGGCACCATGCAAGGTTATGACCGCGACCCACGTTCTATCTCCAAACGTGC	179
		>AY333059.1 Yersinia rohdei strain WA 12/96 glutamine synthetase (glnA) gene, partial cds		** ** ** *********** *********** ***************** ********
		CTCCTCGATTGGTGGCTGGAAAGGCATTAACGAATCCGACATGGTACTGATGCCAGACGCCAGCACTGCT		ruckeri AGAAGACTTCCTGAAATCTTCAGGTATCGCAGATACCGTGCTGTTCGGACCAGAACCTGA	237
		GTTATGGATCCGTTCTTCGAAGACTCAACACTGATTATCCGTTGTGACATCCTCGAGCCAGGCACCATGC		rohedi TGAAGACTTCCTGAGATCTTCTGGCATTGCAGATACCGTGCTGTTCGGGCCTGAGCCAGA	240
		AAGGTTATGACCGCGACCCACGTTCTATCTCTAAACGTGCTGAAGACTTCCTGAGATCTTCTGGCATTGC		frederiksenii AGAAGACTTCCTGAAATCTTCTGGTATCGCCGATACCGTGCTGTTCGGGCCAGAACCAGA	239
		AGATACCGTGCTGTTCGGGCCTGAGCCAGAATTCTTCCTGTTTGACGACGTACGTTTTGGTAGCAGCATC		************* ****** ** ** ** ***************** ** ** ** **
		CGCGGCTCCCATGTCTCTATCGATGATATCGAAGGCGCCTGGAACTCCAGCACTAAATACGATGGCGGCA		ruckeri ATTCTTCTTGTTTGACGATATTCGCTTTGGCAGCAGCATCCGTGGCTCCCACGTTGCTAT	297
		ACAAAGGCCACCGCCCTGCAGTAAAAGGCGGTTACTTCCCGGTTCCTCCTGTCGACTCTTCACAGGATCT		rohedi ATTCTTCCTGTTTGACGACGTACGTTTTGGTAGCAGCATCCGCGGCTCCCATGTCTCTAT	300
		GCGTTCTACCATGTGTTTGACCATGGAAGAAATGGGCCTGGTAGTTGAAGCGCATCACCATGAAGTTGCA		frederiksenii ATTCTTCCTGTTCGATGACGTTCGTTTTGGTAGCAGCATCCGCGGTTCCCACGTCGCTAT	299
		ACAGCAGGTCAGAACGAAGTGGCTACCCGCTTCAATACTATGACCAAGAAAGCTGACGAAATTCAGATTT		******* **** ** ** * ** ***** *********** ** ***** ** ****
		ACAAATATGTCGTGCATAACGTGGCACACGCCTTCGGTA		ruckeri CGATGATATCGAAGGCGCATGGAACTCCAGCACCAAATACGAAGGTGGTAACAAAGGCCA	357
				rohedi CGATGATATCGAAGGCGCCTGGAACTCCAGCACTAAATACGATGGCGGCAACAAAGGCCA	360
				frederiksenii CGATGATATCGAAGGTGCATGGAACTCCAGCACCAAATACGAAGGCGGCAACAAAGGCCA	359
		>AY333030.1 Yersinia frederiksenii strain CNY 867 glutamine synthetase (glnA) gene, partial cds		*************** ** ************** ******** ** ** ***********
		TCCTCGATTGGTGGCTGGAAAGGCATTAATGAATCCGACATGGTACTGATGCCAGACGCCAGCACCGCTG		ruckeri TCGTCCCGCAGTAAAAGGCGGTTACTTCCCGGTTCCCCCAGTTGATTCCGCGCAAGATCT	417
		TTATGGATCCGTTCTTCGAAGATTCCACACTGATTATCCGTTGTGACATCCTTGAGCCAGGCACCATGCA		rohedi CCGCCCTGCAGTAAAAGGCGGTTACTTCCCGGTTCCTCCTGTCGACTCTTCACAGGATCT	420
		AGGTTATGACCGCGACCCACGTTCTATCTCCAAACGTGCAGAAGACTTCCTGAAATCTTCTGGTATCGCC		frederiksenii CCGTCCAGCAGTAAAAGGCGGCTACTTCCCGGTTCCTCCGGTCGATTCTTCACAGGATTT	419
		GATACCGTGCTGTTCGGGCCAGAACCAGAATTCTTCCTGTTCGATGACGTTCGTTTTGGTAGCAGCATCC		** ** ************** ************** ** ** ** ** * ** *** *
		GCGGTTCCCACGTCGCTATCGATGATATCGAAGGTGCATGGAACTCCAGCACCAAATACGAAGGCGGCAA		ruckeri GCGTTCTGCCATGTGTTTAACCATGGAAGATATGGGTCTGGTTGTTGAAGCACATCACCA	477
		CAAAGGCCACCGTCCAGCAGTAAAAGGCGGCTACTTCCCGGTTCCTCCGGTCGATTCTTCACAGGATTTG		rohedi GCGTTCTACCATGTGTTTGACCATGGAAGAAATGGGCCTGGTAGTTGAAGCGCATCACCA	480
		CGTTCTACCATGTGTTTAACCATGGAAGAAATGGGTCTGGTTGTTGAAGCTCATCACCATGAAGTTGCTA		frederiksenii GCGTTCTACCATGTGTTTAACCATGGAAGAAATGGGTCTGGTTGTTGAAGCTCATCACCA	479
		CTGCTGGCCAGAACGAAGTAGCAACCCGCTTCAATACCATGACCAAGAAAGCGGACGAAATTCAGATTTA		******* ********** *********** ***** ***** ******** ********
		CAAATATGTCGTGCACAACGTAGCCCATGCATT		ruckeri CGAAGTCGCCACTGCTGGTCAGAACGAAGTGGCTACCCGCTTCAATACCATGACCAAGAA	537
				rohedi TGAAGTTGCAACAGCAGGTCAGAACGAAGTGGCTACCCGCTTCAATACTATGACCAAGAA	540
				frederiksenii TGAAGTTGCTACTGCTGGCCAGAACGAAGTAGCAACCCGCTTCAATACCATGACCAAGAA	539
				***** ** ** ** ** *********** ** ************** ***********
				ruckeri AGCGGATGAAATCCAAATCTACAAATATGTCGTGCACAACGTAGCGCAT----------	586
				rohedi AGCTGACGAAATTCAGATTTACAAATATGTCGTGCATAACGTGGCACACGCCTTCGGTA	599
				frederiksenii AGCGGACGAAATTCAGATTTACAAATATGTCGTGCACAACGTAGCCCATGCATT-----	593
				*** ** ***** ** ** ***************** ***** ** **
		>CP052034.1:3404283-3405613 Aeromonas salmonicida subsp. salmonicida strain J411 chromosome, complete genome
		ATGGACAGTATCAAGGGCTGGATGGAGAGCAATCGCATCACGGAAGTGGAGTGCCTGTTTCCGGATTTCA
		CCGGTAATGCCCGAGGCAAGATCATTCCAGCCAACAAATTTTTGCGCGAAGGGGGCATGCGGCTGCCCGA
		GGTCATCTTCACCCAGACGGTGACCGGCGAGTACCCGGATGACGACAGCATGATAGACCCGCTGGAGCGG
		GACATGCAGCTCTACCCGGACCCCAACACCATTCGTTTCGTGCCCTGGGCGCTGGAGCCGACCGCTCAGG
		TGATCCACGACTGTTTCGACATCAATGGCAACCTTATCGACATAGCGCCGCGTTCGGTGCTGCGTCGGGT
		CCTGTCATTTTATGAGAAACAGGGCTGGAAGCCGGTGGTCGCCCCCGAGCTCGAATTCTACCTGGTCAAG
		CGCAACGAAGACCCGACTATCCTCTGGTACCGCCCATTGGCCGCAATGGCCGCCCGGAGACTGCCCGCCA
		GTCGTTCAGCATCGATGCGGTCAACGAATTCGACCCCATCTTCGAGGACATGTACGACTACTGCGAGGCG
		CAGGAACTGGAAGTGGACACCCTTATCCACGAATCTGGCGCCGCCCAGATGGAGATCAACTTCCTGCACG
		GCGATGCCATCGATCTGGCCGATCAGGTGTTCCTGTTCAAGCGCACCATGCGGGAAGCGGCTCACCGTCA
		CGGCATCTATGCCACCTTTATGGCCAAGCCGATGAGCGACGAGCCGGGCTCCGCCATGCACATCCACCAG
		AGCCTGGAAGATGTGAACGGTCGCAATCTGTTCGGCACGGACAATGGCGGCAATAGCGAGCAGTTCATGC
		ACTTTATCGCTGGTCTGCAGAAATACACGCCAGCCGTGACTGCCTTGCTGGCGCCGAACGTCAACTCCTA
		TCGTCGGCTCACCTTTGGCGAGAGCGCGCCGCGCAACGTGCAGTGGGGTGTAGAGAACCGCACCTGTGGC
		CTGCGGGTGCCCTTCTCCGATGCCAGTGCCCGCCGGGTAGAGAACCGTTTTGCTGGCGCCGATGCCAACC
		CCTATCTGGCACTGGCTGCGACCCTGGCCTGCGGCTACCTCGGCATGATGGAAAAGCTGGAGCCGTTGCC
		GGAAATGAAGTCGAGCGCCTATGACCTGCCTTACAGTCTGCCCCGTTCGCTGGAAGAGGCCCTGAGCCAT
		CTTGAGCAGTGCGAGCCCATCAAGGAGATGCTGGGGGAGCGTTTTATCCGCGCCTTCGTGGCTGTCAAGC
		GCAAGGAGTACGAGACCTACTTCGGGGTGATAAGCCGCTGGGAACGGGAGTTCCTGCTGCTGAACGTGTG
		A
		>BJTD01000011.1:c16380-14191 Flavobacterium psychrophilum KKAC-1706 DNA, contig00011, whole genome shotgun sequence
		ATGTCAACAATTCGTTTTCAAGCATTAAAAGAAGCATCAGGAAGAAAACCTGTAAAATTTGAAGAAGCCG
		ATAGAAAATCTAATATTTTCGGAGCAAATGTGTTTAATGACAAAGCAATGAAGCAATTTCTTACTTCAGA												ruckeri ---CTCGATTGGTGGCTGGAAAGGCATTAACGAATCCGACATGGTATTGATGCCAGATGC	57
		TGCGTATAAAGGAGTGAAAGACGCCGTACAGCACGGAACAAAAATTGATAGAAAATTAGCCGATTATATC												rohedi CTCCTCGATTGGTGGCTGGAAAGGCATTAACGAATCCGACATGGTACTGATGCCAGACGC	60
		GCCATGGGTATGAAAGAATGGGCATTGTCTAAAGGAGTGACTCATTATACACACTGGTTTCAACCTCTTA												frederiksenii -TCCTCGATTGGTGGCTGGAAAGGCATTAATGAATCCGACATGGTACTGATGCCAGACGC	59
		CAGGAACCACTGCTGAAAAACATGATGCCTTTTTTGAAACTTCTTACGACGGAAGCGAGTCATTTGAAAA												*************************** *************** ********** **
		ATTTGGTGGCGCACAATTGGTTCAACAAGAACCAGACGCATCAAGTTTTCCTAACGGAGGAATTAGAAAT												ruckeri CAGCACTGCAGTGATGGATCCATTCTTCGCAGATTCTACCCTGATTATCCGTTGTGACAT	117
		ACATTTGAAGCTCGTGGTTATACGGCTTGGGATCCAACATCGCCAGCATTTATCTTCGGAACTACTTTAT												rohedi CAGCACTGCTGTTATGGATCCGTTCTTCGAAGACTCAACACTGATTATCCGTTGTGACAT	120
		GTATCCCAACGGTTTTTATATCTTATACAGGTGAAGCATTAGATTACAAAACACCATTATTACGTGCACT												frederiksenii CAGCACCGCTGTTATGGATCCGTTCTTCGAAGATTCCACACTGATTATCCGTTGTGACAT	119
		GCATTCAATAGATCAAGCTGCGACAGACGTTTGTAAATATTTTGATAAAAATGTTAAAAAAGTAACCGCA												****** ** ** ******** ******* *** ** ** ********************
		ACTTTAGGTTGGGAACAAGAATATTTCTTAATCGATGTAGCTTTAGCAAATTCTCGCCCTGATATTCTCA												ruckeri TCTGGAACCCGGCACCATGCAGGGTTATGACCGTGACCCACGTTCTATCTCCAAACGTGC	177
		TGACAGGAAGAACTTTATTAGGACACACTTCTGCAAAAGGACAACAATTAGACGACCATTATTTTGGGTC												rohedi CCTCGAGCCAGGCACCATGCAAGGTTATGACCGCGACCCACGTTCTATCTCTAAACGTGC	180
		AATCCCAACAAGAGCGTTAAATTATATGCGTGAATTGGAACAAGAATGTATGTATCTTGGAATTCCAGTA												frederiksenii CCTTGAGCCAGGCACCATGCAAGGTTATGACCGCGACCCACGTTCTATCTCCAAACGTGC	179
		AAAACACGTCATAACGAAGTAGCACCCAATCAGTTCGAGTTGGCACCTATTTTCGAAGAAACAAACCTTG												** ** ** *********** *********** ***************** ********
		CCGTAGACCACAATTCATTATTAATGGATGTGATGCATAAAGTAGGAGAGCGCCATGATTTTAAAGTATT												ruckeri AGAAGACTTCCTGAAATCTTCAGGTATCGCAGATACCGTGCTGTTCGGACCAGAACCTGA	237
		ATTTCACGAAAAACCTTTCAAAGGAGTAAATGGGTCAGGAAAACACAACAACTGGTCATTAGCAACAGAT												rohedi TGAAGACTTCCTGAGATCTTCTGGCATTGCAGATACCGTGCTGTTCGGGCCTGAGCCAGA	240
		ACTGGAATAAATTTGTTAAGTCCAAGCAAAACGCCAATGAGTAACCTTCAATTCTTGTCGTTTTTTATCA												frederiksenii AGAAGACTTCCTGAAATCTTCTGGTATCGCCGATACCGTGCTGTTCGGGCCAGAACCAGA	239
		ATACCATCAAAGCGGTAAACGATTATGAAGAATTATTAAGAGCAGCCATTGCAACAGCAACAAATGACCA												************* ****** ** ** ** ***************** ** ** ** **
		CAGATTAGGAGCAAACGAAGCGCCACCAGCAATTATATCAGTATTTATTGGCGAGCAATTAACAAAAGTG												ruckeri ATTCTTCTTGTTTGACGATATTCGCTTTGGCAGCAGCATCCGTGGCTCCCACGTTGCTAT	297
		TTGGCTGAGCTAGAAGGCGTTACAACAGGGAAATTATCTCCAGAAGAAAAAACAGATTTAAAACTAAACG												rohedi ATTCTTCCTGTTTGACGACGTACGTTTTGGTAGCAGCATCCGCGGCTCCCATGTCTCTAT	300
		TAGTAGGTAAAATTCCAGATGTGCTTTTAGATAATACCGACAGAAATAGAACATCACCATTTGCCTTTAC												frederiksenii ATTCTTCCTGTTCGATGACGTTCGTTTTGGTAGCAGCATCCGCGGTTCCCACGTCGCTAT	299
		AGGAAATAAATTTGAGTTCAGAGCCGTTGGTTCTTCTGCAAATTGTGCAAACTCAATGACCATATTAAAT												******* **** ** ** * ** ***** *********** ** ***** ** ****
		ACAATTGTAGCCAAACAATTGAAAGATTTTAAAATAGAAGTTGATGCTTTAATAGAAAGCAAAGACATGA												ruckeri CGATGATATCGAAGGCGCATGGAACTCCAGCACCAAATACGAAGGTGGTAACAAAGGCCA	357
		AAAAAGACGATGCTATTTTCAATGTTTTGAGAGAATACATCAAAAAATCTAAGAAAATTCTTTTCGAAGG												rohedi CGATGATATCGAAGGCGCCTGGAACTCCAGCACTAAATACGATGGCGGCAACAAAGGCCA	360
		AGATGGTTATAGCGATGCTTGGGAAGTAGAAGCTAAAAAACGTGGTTTAAGTAATTTTAAAACCACACCA												frederiksenii CGATGATATCGAAGGTGCATGGAACTCCAGCACCAAATACGAAGGCGGCAACAAAGGCCA	359
		TTAGCATTAAAAGCAAAAGTGTCTAAACAAGCTTTAGACTTATTCTCTGAAATGAACGTCATGAACCACG												*************** ** ************** ******** ** ** ***********
		TTGAAGTAGAAGCTCGTTACGAAATTGAATTAGAAGAATATACTAAGAAAATTCAAATTGAAGGTCGTGT												ruckeri TCGTCCCGCAGTAAAAGGCGGTTACTTCCCGGTTCCCCCAGTTGATTCCGCGCAAGATCT	417
		TTTAGGAGATATTGCTCGTAATCACGTGATTCCAACAGCCATTAAATACCAAAACACATTAATAGAAAAT												rohedi CCGCCCTGCAGTAAAAGGCGGTTACTTCCCGGTTCCTCCTGTCGACTCTTCACAGGATCT	420
		GTAAAAGGATTGAAAGATATTTTTGGAGATGAATTTAAAAAAATTGGTAAAGAACAAATAGTTTTAATCA												frederiksenii CCGTCCAGCAGTAAAAGGCGGCTACTTCCCGGTTCCTCCGGTCGATTCTTCACAGGATTT	419
		AAGAAATTTCTGAACATATAGAAGGTATTAATACTAAAGTTGAAGCCATGACAGAAGCTCGTAAAAAAGC												** ** ************** ************** ** ** ** ** * ** *** *
		AAATGTTATAACCAATGCTCAAAAAATGGCAGAATCATATTGCGATGCTGTAAAACCTTATTTTGATAAA												ruckeri GCGTTCTGCCATGTGTTTAACCATGGAAGATATGGGTCTGGTTGTTGAAGCACATCACCA	477
		ATTCGCGAACACTGCGACAAACTAGAATTGTTAGTAGATAACGAAAGTTGGACATTAACAAAATATAGAG												rohedi GCGTTCTACCATGTGTTTGACCATGGAAGAAATGGGCCTGGTAGTTGAAGCGCATCACCA	480
		AGTTATTGTTTACAAAATAA												frederiksenii GCGTTCTACCATGTGTTTAACCATGGAAGAAATGGGTCTGGTTGTTGAAGCTCATCACCA	479
														******* ********** *********** ***** ***** ******** ********
		>CP000910.1:c503869-502505 Renibacterium salmoninarum ATCC 33209, complete genome												ruckeri CGAAGTCGCCACTGCTGGTCAGAACGAAGTGGCTACCCGCTTCAATACCATGACCAAGAA	537
		ATGCCTAAGAATTCGCGCATGCTCAGCGTTGAACAACTTCGCGACCTCATCACGGAAGGCAACATCGATA												rohedi TGAAGTTGCAACAGCAGGTCAGAACGAAGTGGCTACCCGCTTCAATACTATGACCAAGAA	540
		CCGTGGTGCTCGCCTTTACCGATATGCAGGGCCGACTCCAGGGCAAGTACATTCACGGTGATTTCTTCGT												frederiksenii TGAAGTTGCTACTGCTGGCCAGAACGAAGTAGCAACCCGCTTCAATACCATGACCAAGAA	539
		CGAAGACGTGCTAGCTCATGGAGCTGAGGGCTGTAATTACTTACTTGCTGTTGATACCGAGATGAACACC												***** ** ** ** ** *********** ** ************** ***********
		GTTGACGGTTACGAAATGACCAGCTGGGAATCTGGTTACGGGGACATGTTTTTTGACATTGACCTGGAAA												ruckeri AGCGGATGAAATCCAAATCTACAAATATGTCGTGCACAACGTAGCGCAT----------	586
		CGATTAGGTGGATGTCACATGTTCCGGGCACCGCGATGATTCAGTGCGATCTGAAGTTGGTCGATGGCAG												rohedi AGCTGACGAAATTCAGATTTACAAATATGTCGTGCATAACGTGGCACACGCCTTCGGTA	599
		CCCGCTCAATGTTTCGCCGCGCACCATTTTGAAGCGTCAAGTAGACCGGGCAGCAAAAAACGGTTGGCAA												frederiksenii AGCGGACGAAATTCAGATTTACAAATATGTCGTGCACAACGTAGCCCATGCATT-----	593
		GGGCTGGCCGGAACTGAGCTGGAATTCGTGGTGTACAACAACAGCTACGAAGAGGCCTGGAGCCAGCGAT												*** ** ***** ** ** ***************** ***** ** **
		ATTTGGATCTGGTGCCCGCTAATCAGTACAACGTTGACTACTCGATTATTGGCTCTGCACGGGTAGAGCC
		CTTGTTGCGGGAGATTCGTAATGCCACCTACGCAGCTGGGCTCAATCCAGAGTCAGCTAAAGGTGAATGC
		AATCTTGGCCAGCATGAGATCGCTTTTAAGTATGACGACGTGCTGAGCACTGCGGATAACCACTCGGTTT
		ACAAGACCATGGCGAAAGAAATTGCAGCTCAGCAACACAAGGCAATTACCTTCATGGCTAAACCCAATGA
		ACGTGAGGGGAACTCCTGCCACATCCACCTGTCATTGCGAGGCACTGATGGCAAACTGGTGTTTTGGGAC
		GGTGAGACTGGCCAGCGCACCGCCCTTTATGATCACTTCATTGCTGGCATCCTCACTACGATGCGCGAAT
		TCACTCTGTTTTATGCGCCCAATATCAATTCCTATAAGCGATTCCAGCAGGGTTCTTTTGCGCCGACGGC
		GGTGGCCTGGGGAATCGATAACCGCACCTGCTCCATTCGCCTTGTCGGTCACGATCAATCAGCCCGTTTG
		GAGAACCGGCTCCCTGGCGGCGATGCCAATCCATATCTAGCCATCGCCGCGATGATGGCCGGCGGACTCT
		ACGGAATTGAGCACAAACTGGAATTGGAGCCCATGACGGTTGGCAATGCCTACACCTCAGGTGCTCCCAC
		CGTGCCCGCAACACTTCAAGAAGCGCGAGACCTCTTCGCTTCCTCCGCGATCGCGCGTGAAGTGTTCGGC
		GAAGAGGTGGTCAAGCATTACACCAATTACGCGGATGTTGAGATTACAGCCTTCAACGGCGCCATCACGG
		ATTGGGAGTTGCGTCGTGGCTTCGAGCGGCACTGA

## Sheet: Agarose gels
Colony PCR for confirming transformation																	Universal bacterial PCR assay for seawater														Universal bacterial PCR assay for lake water
band size is 830, 843 and 837 bp for Y. ruckeri, Y. rohedi and Y. frederiksenii respectively
	Conventional PCR amplifying 109 bp of glutamine synthetase gene for limit of detection														Conventional PCR amplifying 109 bp of glutamine synthetase gene following filtration and extraction using KOH

## Sheet: Primer selection
Primer sets selection
																		Primer set	Primer	Sequence (5'-3')	Length (bp)
																		Yr#1	F3	TGTTCGGACCAGAACCTGAA	20
																			B3	GGCAGAACGCAGATCTTGC	19
																			FIP	GGAGTTCCATGCGCCTTCGATAACGATATTCGCTTTGGCAGC	42
																			BIP	AGGTGGTAACAAAGGCCATCGTATCAACTGGGGGAACCGG	40
																			LF	AACGTGGGAGCCACGGA	17
																		Yr#2	F3	GGTGGTAACAAAGGCCATCG	20
																			B3	GCTACGTTGTGCACGACAT	19
																			FIP	CATGGCAGAACGCAGATCTTGCTAAAAGGCGGTTACTTCCCG	42
																			BIP	AAGCACATCACCACGAAGTCGCTCCGCTTTCTTGGTCATGG	41
																			LF	GCGGAATCAACTGGGGGAA	19
																			LB	CTGCTGGTCAGAACGAAGTG	20
																		Yr#3*	F3	CGCAGTAAAAGGCGGTTACTT	21
																			B3	GCTACGTTGTGCACGACA	18
																			FIP	TGCTTCAACAACCAGACCCATATCTCCCAGTTGATTCCGCGC	42
																			BIP	TCGCCACTGCTGGTCAGAATTGGATTTCATCCGCTTTCTTGGT	43
																			LF	GGTTAAACACATGGCAGAACGC	22
																		Yr#4*	F3	ACCAGAACCTGAATTCTTCT	20
																			B3	GGCAGAACGCAGATCTTGC	19
																			FIP	GGAGTTCCATGCGCCTTCGATATGACGATATTCGCTTTGGCA	42
																			BIP	TGGTAACAAAGGCCATCGTCCCGCGGAATCAACTGGGGGAACCGGGA	47
		Primers set	Tp1	Tp2	mean	mean (mm:ss)	SD	SD(s)											LF	AGCAACGTGGGAGCCAC	17
		Yr#1	5.73333	5.5	5.61666	05:37:00	0.116665	6.9999
		Yr#2	6.76666	6.25	6.50833	06:30:00	0.25833	15.4998
		Yr#3	6.07	8.75	7.41	07:42:00	1.34	80.4
		Yr#4	19.3333	16.25	17.7917	17:47:00	1.54167	92.4999

## Sheet: Primers optimisation
	Initial primers optimisation												Final primers optimisation
	Primer	Concentration (µM)
		Concentration 1	Concentration 2	Concentration 3	Concentration 4	Concentration 5	Concentration 6	Concentration 7					Y. ruckeri	Y. rohedi	Y. frederiksenii	No Template Control
	F3/B3	0.2	0.2	0.2	0.2	0.2	0.2	0.2					Yr	Yh	Yf	NTC
	FIP/BIP	0.8	1.2	1.2	1.2	1.6	1.6	1.6
	Loop F	0.4	0.2	0.4	0.8	0.2	0.4	0.8
															Concentration (µM)	Y. ruckeri
		FIP & BIP, F3 & B3, LF (µM)	Tp (mm: ss)			Tp1	Tp2	Tp3	mean	Average Tp (mm:ss)	SD	SD (s)			(FIP & BIP, F3 & B3, LF)	Tp1	Tp2	Tp3	mean	Average Tp	SD	SD (s)
	Conc.1	0.8, 0.2, 0.4	05:17:00	05:16:00	05:08:00	5.28333	5.26667	5.13333	5.22778	05:13:40	0.067128	4.02768			0.8, 0.2, 0.4	4.8	4.9	5	4.9	04:54:00	0.0816497	4.89898
	Conc. 2	1.2, 0.2, 0.2	06:56:00	07:08:00	07:04:00	6.93333	7.13333	7.06667	7.04444	07:02:40	0.0831479	4.98888			1.2, 0.2, 0.4	5.6	4.61667	6.25	5.48889	05:29:00	0.671418	40.2851
	Conc. 3	1.2, 0.2, 0.4	05:00:00	05:30:00	05:15:00	5	5.5	5.25	5.25	05:15:00	0.204124	12.2474			1.2, 0.2, 0.8	5.8	5.25	5.75	5.6	05:36:00	0.248328	14.8997
	Conc. 4	1.2, 0.2, 0.8	05:50:00	05:40:00	05:38:00	5.83333	5.66667	5.63333	5.71111	05:42:40	0.087489	5.24934			1.6, 0.2, 0.8	5.3	5.31667	5.75	5.45556	05:27:00	0.208315	12.4989
	Conc. 5	1.6, 0.2, 0.2	07:15:00	07:15:00	07:15:00	7.25	7.25	7.25	7.25	07:15:00	0	0
	Conc. 6	1.6, 0.2, 0.4	06:15:00	06:15:00	06:16:00	6.25	6.25	6.26667	6.25556	06:15:20	0.00785674	0.471405			Concentration (µM)	Y. rohedi
	Conc. 7	1.6, 0.2, 0.8	05:30:00	05:15:00	05:30:00	5.5	5.25	5.5	5.41667	05:25:00	0.117851	7.07107			(FIP & BIP, F3 & B3, LF)	Tp1	Tp2	Tp3	mean	Average Tp	SD	SD (s)
															0.8, 0.2, 0.4	23.6667	21.5833		22.625	22:37:00	1.04167	62.5
															1.2, 0.2, 0.4	29.6167	20.0167		24.8167	1 day, 0:49:00	4.8	288
															1.2, 0.2, 0.8	14.3833	16.25	29.75	20.1278	20:08:00	6.84648	410.789
															1.6, 0.2, 0.8				#DIV/0!		#DIV/0!	#DIV/0!
															Concentration (µM)	Y. frederiksenii
															(FIP & BIP, F3 & B3, LF)	Tp1	Tp2	Tp3	mean	Average Tp	SD	SD (s)
															0.8, 0.2, 0.4	18.85	17.3667	18.25	18.1556	18:09:00	0.60924	36.5544
															1.2, 0.2, 0.4	19.7333	11.9833	17.5	16.4056	16:24:00	3.2572	195.432
															1.2, 0.2, 0.8	13.9833	14.5	17.5	15.3278	15:20:00	1.55041	93.0245
															1.6, 0.2, 0.8			24	24	1 day, 0:00:00	0	0

## Sheet: Specificity
	Yr-LAMP assay specificity
																																		Aeromonas salmonicida
																																		Flavobacterium psychrophilum
																																		Renibacterium salmoninarum

## Sheet: Limit of detection
	Yr-LAMP assay sensitivity
	Copy number (copies/µl)	Concentration	Tp1	Tp2	Tp3	Tp4	Tp5	Tp6	Tp7	Tp8	Tp9	Tp10	Mean	Average Tp	SD	SD (ss)	Inter CV%
	1.1 x 108	0.5 ng/ul	6.8	5.2	5.8	5.33333	5.31667	5.58333	5.61667	6.16667	6.8	5.88333	5.85	05:51:00	0.548483	32.909	9.37577
	1.1 x 107	0.5x10-1 ng/ul	6.4	6.38333	6.31667	5.95	5.96667	6.45	6.85	6.68333	6.66667	6.41667	6.40833	06:24:00	0.274494	16.4697	4.2834
	1.1 x 106	0.5x10-2 ng/ul	7.55	7.38333	7.28333	6.71667	6.68333	7.6	8.2	7.66667	7.71667	7.31667	7.41167	07:25:00	0.432888	25.9733	5.84062
	1.1 x 105	0.5x10-3 ng/ul	8.61667	8.38333	8.13333	7.7	7.61667	8.65	10.15	8.43333	8.46667	8.46667	8.46167	08:28:00	0.657185	39.4311	7.76661
	1.1 x 104	0.5x10-4 ng/ul	9.98333	9.63333	9.56667	8.85	8.8	9.85	10	9.93333	9.91667	9.56667	9.61	09:37:00	0.422571	25.3543	4.39721
	1.1 x 103	0.5x10-5 ng/ul	11.5667	11.2667	10.7333	10.4667	10.2333	11.95	12.9833	11.7333	11.4833	10.85	11.3267	11:20:00	0.768013	46.0808	6.78058
	1.1 x 102	0.5x10-6 ng/ul	13.8	13.6833	12.2667	11.7833	12.6833	14.45	15.3167	14.8833	13.3667	13.9167	13.615	13:37:00	1.06931	64.1583	7.85388
	1.1 x 10	0.5x10-7 ng/ul	17.5333	18.6167	12.7333	13.4333	18.5333	15.4167	17.3833	14.2167	16.0667	14.7833	15.8717	15:52:00	1.9907	119.442	12.5425
	1.1	0.5x10-8 ng/ul					17.15				27.1167		22.1333	22:08:00	4.98333	299	22.5151
	1.1 x 10-1	0.5x10-9 ng/ul

## Sheet: Filtration sensitivity
		Sample	Tp1	Tp2	Tp3	mean	Average Tp	SD	SD (s)	Tm1	Tm2	Tm3	mean
		Undiluted (8000)	5.16667	5.65	5.61667	5.47778	05:29:00	0.220409	13.2246	87.9	87.7	87.7	87.7667
		800	6.13333	6.18333	6.33333	6.21667	06:13:00	0.0849837	5.09902	87.9	87.9	87.6	87.8
		80	7.33333	8.16667	8.21667	7.90556	07:54:00	0.405137	24.3082	87.8	87.5	87.5	87.6
		8	8.43333	9.2	9.18333	8.93889	08:56:00	0.357547	21.4528	87.8	87.6	87.5	87.6333
		0.8	9.88333	11.0333	11.3333	10.75	10:45:00	0.624944	37.4967	87.9	87.7	87.7	87.7667
		0.08	14.3	14.15	12.7333	13.7278	13:44:00	0.70584	42.3504	87.9	87.4	87.5	87.6
		Positive Ctrl	5.61667	5.65	5.81667	5.69444	05:41:00	0.087489	5.24934	88.2	88.2	88.1	88.1667
